# Supplementary material for: Magnetic Resonance Imaging of the Brain Using Compressed Sensing – Quality Assessment in Daily Clinical Routine
Source: Springer Nature journal article supplement (doi:10.1007/s00062-019-00789-x), 2019-05-16
Supplement: MOESM2 [file 16728500]

# Supplements Table 2

| Sequence CS+ | TE  [msec] | TR  [msec] | TI [msec] | FOV | AT  [sec] |
| --- | --- | --- | --- | --- | --- |
| 3D FLAIR | 279.0 | 4800 | 1650.0 | 250.0 x 250.0 x 199.9 | 235 |
| 3D DIR | 363.0  (“shortest”) | 5500 | 2550.0  440.0 | 240.0 x 252.0 x 189.8 | 391 |
| 3D T2 | 261 (“shortest”) | 2500 | / | 239.0 x 250.9 x 200.3 | 198 |
| 3D T1 | 4.0 | 9 | 760.1 | 240.0 x 252.0 x 200.3 | 148 |
| Ax. FLAIR | 140.0 | 12000 | 2850.0 | 230.0 x 230.0 x 144.0 | 168 |
| Ax. T2 | 87.0 | 3366 | / | 230.0 x 199.8 x 166.8 | 108 |
| Ax. T2* | 16.1 | 864  ("shortest") | / | 230.0 x 201.3 x 144.0 | 78 |
| 3D art. TOF | 3.5 | 25 | / | 200.0 x 200.0 x 88.0 | 247 |

Table S2. CS+ additional sequence parameters.

Abbreviations: CS+ = with CS, TE = time to echo, TR = time to repeat, TI = inversion time, FOV = field of view (AP [mm] x RL [mm] x FH mm]), AT = acquisition time, / = not applicable, Ax. = axial, Gd = gadoteric acid (used as contrast medium), DIR = double inversion recovery, FLAIR = fluid attenuated inversion recovery, TOF = arterial time-of-flight MR angiography.
